# Supplementary material for: Prediction of the Risk of Myocardial Infarction from Polymorphisms in Candidate Genes
Source: Atypon-hosted journal article supplement (doi:10.1056/nejmoa021445), 2002-12-11
Supplement: 1916sa.pdf [file 1916sa.pdf]

# Supplementary Appendix

This appendix has been provided by the authors to give readers additional information about their work.

Supplement to: Yamada Y, Izawa H, Ichihara S, et al. Prediction of the Risk of Myocardial Infarction from Polymorphisms in Candidate Genes. *N Engl J Med* 2002;347:1916-23.

**SUPPLEMENTARY APPENDIX 1. PRIMERS, PROBES, AND OTHER CONDITIONS IN THE GENOTYPING STUDIES.**

| GENE                                       | POLYMORPHISM | LABELS* | PRIMERS                       | No. of Cycles | PROBES                                                       | STRENGTH OF FORMAMIDE |
|--------------------------------------------|--------------|---------|-------------------------------|---------------|--------------------------------------------------------------|-----------------------|
| Angiotensinogen                            | G-6A         | TxR     | 5'CGGAGGTTCTTCCCXGG3'         | 35            |                                                              |                       |
|                                            |              | FITC    | 5'CGCAGCTTCTTCCXIG3'          |               |                                                              |                       |
|                                            |              | Biotin  | 5'CCACCCTCAGCTATAAATAGG3'     |               |                                                              |                       |
| Apolipoprotein C-III                       | C-482T       | Biotin  | 5'CGGAGCACCTGATGCXIG3'        | 35            | 5'AGCCACTGATGCXGGTCT3'<br>5'AGCCACTGATGCXGGTCT3'             | 30%                   |
|                                            |              | FITC    | 5'GATGGAGGAGGTTCTXGA3'        |               |                                                              |                       |
|                                            |              | TxR     | 5'AGAATGGAGGAGGTTCTXJA3'      |               |                                                              |                       |
| Apolipoprotein E                           | G-219T       | Biotin  | 5'CCAGAAAGGAGGACACCTC3'       | 35            |                                                              |                       |
|                                            |              | TxR     | 5'CGGATGACCTGCAGAAIXG3'       |               |                                                              |                       |
|                                            |              | FITC    | 5'CGGCTGTTACTACTGCCAG3'       |               |                                                              |                       |
| Apolipoprotein E                           | C4070T       | Biotin  | 5'CTCAGAAATGGCCAAAAXCC3'      | 40            |                                                              |                       |
|                                            |              | TxR     | 5'CTCAGAAATGGCCAAAAXCC3'      |               |                                                              |                       |
|                                            |              | FITC    | 5'CTCAGAAATGGCCAAAAXTC3'      |               |                                                              |                       |
| Connexin 37                                | C1019T       | Biotin  | 5'CCAGAGCTGCTGGACGA3'         | 35            |                                                              |                       |
|                                            |              | TxR     | 5'CCAGAGCTGCTGGACGA3'         |               |                                                              |                       |
|                                            |              | FITC    | 5'CCAGAGCTGCTGGACGA3'         |               |                                                              |                       |
| Glycoprotein, Iba $\alpha$                 | C1018T       | Biotin  | 5'CCAGAGCTGCTGGACGA3'         | 40            |                                                              |                       |
|                                            |              | TxR     | 5'CCAGAGCTGCTGGACGA3'         |               |                                                              |                       |
|                                            |              | FITC    | 5'CCAGAGCTGCTGGACGA3'         |               |                                                              |                       |
| Interleukin-10                             | T-819C       | Biotin  | 5'ATAGTGACAAACTGAGGCACA3'     | 35            | 5'GTACAGGTGATGATXATCTCTGTG3'<br>5'GTACAGGTGATGATXATCTCTGTG3' | 40%                   |
|                                            |              | TxR     | 5'ATAGTGACAAACTGAGGCACA3'     |               |                                                              |                       |
|                                            |              | FITC    | 5'ATAGTGACAAACTGAGGCACA3'     |               |                                                              |                       |
| Interleukin-10                             | A-592C       | Biotin  | 5'ACCCCTGTACAGGTGATGATJA3'    | 35            |                                                              |                       |
|                                            |              | TxR     | 5'ACCCCTGTACAGGTGATGATJA3'    |               |                                                              |                       |
|                                            |              | FITC    | 5'ACCCCTGTACAGGTGATGATJA3'    |               |                                                              |                       |
| <i>p22<sup>phox</sup></i>                  | C242T        | Biotin  | 5'GCCTGGAACACATCCTGTGA3'      | 40            |                                                              |                       |
|                                            |              | TxR     | 5'ACCACGGCGGTGATGXG3'         |               |                                                              |                       |
|                                            |              | FITC    | 5'ACCACGGCGGTGATGXG3'         |               |                                                              |                       |
| Paraoxonase                                | G584A        | Biotin  | 5'ACCCAAATAGATCTCCCAGGAXCG3'  | 35            |                                                              |                       |
|                                            |              | TxR     | 5'ACCCAAATAGATCTCCCAGGAXCG3'  |               |                                                              |                       |
|                                            |              | FITC    | 5'ACCCAAATAGATCTCCCAGGAXCG3'  |               |                                                              |                       |
| Plasminogen-activator inhibitor type 1     | 4G-668/5G    | Biotin  | 5'GAATGATATGTTGCTGTGGGAC3'    | 35            | 5'TGGACACGTGGGGGAGTCAG3'<br>5'TGGACACGTGGGGGAGTCAGC3'        | 45%                   |
|                                            |              | TxR     | 5'GGCCGCCTCCGATGATACA3'       |               |                                                              |                       |
|                                            |              | FITC    | 5'GGCCGCCTCCGATGATACA3'       |               |                                                              |                       |
| Platelet-activating factor acetylhydrolase | G994T        | Biotin  | 5'TTCTTTGGTGGAGCAACXGT3'      | 40            |                                                              |                       |
|                                            |              | TxR     | 5'ATTTCTTTGGTGGAGCAACXIT3'    |               |                                                              |                       |
|                                            |              | FITC    | 5'CTTACCTGAACTCTGATCTTCA3'    |               |                                                              |                       |
| Stromelysin-1                              | 5A-1171/6A   | Biotin  | 5'TTGTGATGGGGGAAAAXAC3'       | 40            |                                                              |                       |
|                                            |              | TxR     | 5'TTGTGATGGGGGAAAAXAC3'       |               |                                                              |                       |
|                                            |              | FITC    | 5'TTGTGATGGGGGAAAAXCC3'       |               |                                                              |                       |
| Thrombospondin-4                           | G1186C       | Biotin  | 5'CTCATATCAATGTGGCCAA3'       | 35            |                                                              |                       |
|                                            |              | TxR     | 5'CGAGTTGGAAACGCACACT3'       |               |                                                              |                       |
|                                            |              | FITC    | 5'CGAGTTGGAAACGCACACT3'       |               |                                                              |                       |
| Tumor necrosis factor $\alpha$             | C-863A       | Biotin  | 5'GGTCTGCACATGACATTGATGAG3'   | 35            |                                                              |                       |
|                                            |              | TxR     | 5'GGCCCTGTCTTCGTAAAXGG3'      |               |                                                              |                       |
|                                            |              | FITC    | 5'ATGGCCCTGTCTTCGTAAAXTG3'    |               |                                                              |                       |
|                                            |              | Biotin  | 5'CCAGGGCTATGGAAAGTCGAGTATC3' |               |                                                              |                       |

\*TxR denotes Texas red, and FITC fluorescein isothiocyanate.
